# Supplementary material for: The SAFE Labs Handbook: Community-Driven Commitments for Group Leaders to Improve Lab Culture
Source: bioRxiv preprint, doi:10.1101/2025.05.27.655799, version 2 (2025-07-15)
Supplement: Supplementary Table 3 [file 655799_file04.xlsx]

## Sheet: Sheet1
Questions			Responses
General Informations		ID	2	3	4	5	6	7	8	9	10	11	12	13	14	15	16	17	18	19	20	21	22	23	24	25	26	27	28	29	30	31	32	33	34	35	36	37	38	39	40	41	42	43	44	45	46	47	48
		Current Role	PhD Student	Research Fellow	Intern	PhD Student	PhD Student	PhD Student	Postdoc	Group Leader	Postdoc	PhD Student	Postdoc	Group Leader	PhD Student	Group Leader	Group Leader	Group Leader	PhD Student	lab manager	Group Leader	Group Leader	PhD Student	PhD Student	Postdoc	Postdoc	Group Leader	Postdoc	Postdoc	PhD Student	Group Leader	Group Leader	Masters Student	PhD Student	PhD Student	Group Leader	Postdoc	Postdoc	Masters Student	Technician	Group Leader	Postdoc	Group Leader	PhD Student	Postdoc	Group Leader	Group Leader	Postdoc	Postdoc
		Years in Role	<1	<1	<1	1-2	2-3	2-3	<1	4+	<1	1-2	3-4	1-2	<1	1-2	4+	1-2	2-3	4+	3-4	4+	1-2	<1	<1	3-4	4+	4+	4+	3-4	4+	4+	2-3	2-3	1-2	3-4	<1	4+	1-2	4+	4+	4+	<1	3-4	4+	2-3	4+	4+	3-4
		Field	Neuroscience and Behavioral Science	Neuroscience and Behavioral Science	Neuroscience and Behavioral Science	Neuroscience and Behavioral Science	Neuroscience and Behavioral Science	Neuroscience and Behavioral Science	Neuroscience and Behavioral Science	Ecology and Evolutionary Biology	Neuroscience and Behavioral Science	Systems Biology and Bioinformatics	Neuroscience and Behavioral Science	microbiota-gut-brain axis	Biophysics	Molecular Biology and Genetics	Neuroscience and Behavioral Science	Neuroscience and Behavioral Science	Cell Biology and Cellular Signaling	Molecular Biology and Genetics	Neuroscience and Behavioral Science	Microbiology and Virology	Cell Biology and Cellular Signaling	Molecular Biology and Genetics	Molecular Biology and Genetics	Developmental Biology and Stem Cells	Developmental Biology and Stem Cells	Neuroscience and Behavioral Science	Developmental Biology and Stem Cells	Neuroscience and Behavioral Science	Cell Biology and Cellular Signaling	Molecular Biology and Genetics	Neuroscience and Behavioral Science	Neuroscience and Behavioral Science	Molecular Biology and Genetics	Cell Biology and Cellular Signaling	Neuroscience and Behavioral Science	Neuroscience and Behavioral Science	Immunology and Infectious Diseases	Microbiology and Virology	Biochemistry and Structural Biology	Cell Biology and Cellular Signaling	Neuroscience and Behavioral Science	Neuroscience and Behavioral Science	Cell Biology and Cellular Signaling	Systems Biology and Bioinformatics	Molecular Biology and Genetics	Developmental Biology and Stem Cells	Parasitology
		Country	United Kingdom	Italy	United Kingdom	Italy	Italy	United Kingdom	Italy	United Kingdom	United Kingdom	United Kingdom	United Kingdom	Portugal	Portugal	France	Italy	United Kingdom	Italy	Portugal	United Kingdom	Portugal	Italy	The Netherlands	The Netherlands	Norway	United Kingdom	Germany	United Kingdom	United Kingdom	Spain	Portugal	The Netherlands	France	Ireland	Greece	Switzerland	USA	Greece	United Kingdom	United Kingdom	United Kingdom	United Kingdom	The Netherlands	United Kingdom	United Kingdom	Israel	Germany	Brazil
1	I commit to publicly document a diversity statement.	Importance	5	5	3	5	4	5	5	4	3	3	2	3	4	4	5	3	4	4	4	2	2	4	4	4	4	5	5	2	4	4	3	5	3	5	5	5	5	5	5	5	4	5	4	3	4	4	1
		Established?	Yes	Yes	Yes	Partially	No	Partially	Partially	No	Don't know	No	Partially	Partially	Yes	No	No	No	Partially	Yes	Partially	Partially	Partially	Partially	No	No	Partially	Yes	Partially	Partially	No	No	No	No	No	Yes	Don't know	No	Yes	No	Yes	Yes	Partially	Don't know	Don't know	No	Yes	No	Yes
2	I commit to publicly document the lab code of conduct: emphasise welfare, equity and integrity.	Importance	5	5	3	3	5	5	4	4	4	4	2	3	5	4	5	3	5	5	5	4	5	5	4	4	4	5	5	5	5	4	4	5	4	5	5	5	5	5	5	5	5	4	5	5	4	4	1
		Established?	Yes	Yes	Yes	No	Partially	Yes	Yes	No	Don't know	Partially	Partially	No	Yes	No	No	No	Partially	Yes	Partially	Yes	Partially	Partially	Partially	No	No	Partially	Partially	Yes	No	No	No	No	No	Yes	No	Partially	Yes	Partially	Yes	No	Partially	Partially	Yes	Yes	Yes	No	Partially
3	I commit to publicly document green initiatives in the lab and any explicit rules related to sustainability.	Importance	5	5	5	4	5	4	5	4	4	2	3	4	5	4	5	5	3	5	2	4	5	3	3	4	4	3	5	4	4	4	2	5	4	5	3	5	5	5	5	4	3	4	5	5	3	4	2
		Established?	Yes	Yes	Partially	No	No	Yes	Partially	Yes	Don't know	Partially	No	Partially	Yes	No	Partially	Yes	No	Partially	No	No	No	No	No	Partially	Partially	Yes	Partially	Yes	No	No	No	Partially	No	Partially	No	No	No	Yes	No	No	No	No	Partially	Partially	Partially	No	Yes
4	I commit to publicly document the common lab language and any institutional language requirements.	Importance	5	5	3	5	4	4	4	3	2	4	3	4	5	4	5	4	5	5	3	3	5	5	3	4	2	5	5	5	4	3	4	5	5	5	5	4	5	4	5	4	3	3	5	4	5	4	3
		Established?	Yes	Partially	Partially	No	No	Yes	Partially	No	Don't know	Yes	Partially	Yes	Yes	No	Partially	Partially	Partially	Yes	No	No	Partially	Yes	No	Partially	No	Yes	No	Partially	No	No	No	No	No	Yes	No	No	Yes	No	No	No	No	No	Don't know	Partially	Yes	No	Yes
5	I commit to document the procedure for reporting bullying and/or harassment.	Importance	5	5	3	5	5	5	5	5	5	3	5	4	5	5	5	4	5	5	3	5	5	5	5	4	5	5	5	5	5	4	5	5	5	5	5	5	5	5	5	5	5	5	5	5	5	5	4
		Established?	Yes	No	Yes	No	No	Yes	Partially	No	Don't know	Partially	No	No	Yes	Partially	No	No	No	Yes	Yes	Yes	No	Yes	Yes	No	No	Yes	Yes	Yes	Partially	No	No	No	No	Partially	No	No	Partially	No	Partially	Yes	No	Partially	Yes	Yes	No	No	Partially
6	I commit to document available resources to support mental health.	Importance	5	5	2	5	5	5	5	5	4	1	5	5	3	5	5	5	5	5	4	5	5	5	5	5	4	5	3	4	5	4	5	5	4	5	5	5	5	5	5	5	4	4	4	5	4	5	4
		Established?	Yes	No	Partially	No	Partially	Yes	Yes	No	Yes	No	No	No	Yes	Partially	Partially	Partially	No	Yes	Partially	Partially	No	Yes	Yes	No	Partially	No	No	Yes	No	No	No	No	No	Partially	No	Partially	No	No	Partially	Yes	No	Don't know	Yes	Yes	Partially	No	No
7	I commit to document the procedure for raising lab or inter-personal issues.	Importance	5	5	2	5	4	5	4	5	5	2	5	4	4	5	5	4	5	5	3	5	4	5	5	5	4	5	2	5	4	3	5	5	5	5	5	5	5	4	5	4	5	4	4	5	4	5	3
		Established?	Yes	Partially	No	No	Partially	Yes	Partially	No	Yes	Partially	No	Partially	Yes	No	Partially	Partially	Partially	Yes	No	Yes	No	Yes	Partially	No	No	No	No	Partially	No	No	No	No	No	Partially	No	No	Partially	Partially	Partially	Yes	No	No	Partially	Yes	No	No	Don't know
8	I commit to establish a shared lab calendar for members to indicate if they are away, at conferences etc.	Importance	5	5	2	4	4	4	3	5	5	5	3	5	5	4	5	3	5	4	5	3	1	4	3	4	4	3	5	5	4	4	5	5	2	5	5	4	5	3	4	4	5	4	3	4	2	5	4
		Established?	Yes	Yes	No	Yes	Yes	Yes	Yes	No	Yes	Partially	Yes	Yes	Yes	Yes	No	No	No	Partially	Yes	Partially	No	No	No	Yes	Yes	Yes	Yes	Yes	Partially	Yes	Yes	No	No	Yes	Yes	Partially	Yes	Yes	No	Yes	Yes	No	Partially	No	No	Partially	Partially
9	I commit to publicly document a list of lab members and alumni.	Importance	5	5	3	4	5	4	3	5	4	5	5	5	4	4	5	4	5	4	4	5	2	5	3	4	4	3	4	5	5	4	4	3	3	5	5	5	5	4	4	4	5	4	3	3	5	5	2
		Established?	Yes	No	Partially	Yes	Yes	Yes	No	Yes	Yes	Yes	Partially	Yes	Yes	Yes	Yes	Partially	Yes	Partially	Yes	Yes	No	Partially	Yes	Yes	No	Don't know	No	Yes	Yes	Partially	Partially	No	Yes	Yes	Partially	No	Yes	Partially	Partially	Don't know	Yes	No	No	Partially	Yes	Partially	No
10	I commit to publicly document my expectations for working hours, remote working, and vacation.	Importance	5	5	1	4	5	4	5	4	4	3	5	3	5	5	5	3	5	5	5	5	4	5	4	5	4	4	5	4	4	2	5	4	5	5	5	5	5	3	4	4	4	3	5	5	5	5	2
		Public/Internally	Yes	Yes	No	No	No	Yes	Yes	No	No	No	No	No	Yes	No	Yes	No	Yes	Yes	Yes	No	Yes	Yes	No	No	No	No	No	No	No	No	No	Yes	Yes	No	Yes	No	No	No	No	No	No	No	No	Yes	No	Yes	No
		Established?	Yes	No	No	No	Partially	Yes	No	No	Don't know	Partially	Partially	Partially	Partially	No	Partially	No	No	Partially	Partially	Yes	No	Yes	Partially	Partially	Partially	No	No	Yes	Partially	Partially	No	No	No	Yes	No	Yes	Yes	No	No	Don't know	Partially	Don't know	Yes	Partially	No	No	No
11	I commit to publicly document an overview of the regular meetings in the lab, and my expectations for participation.	Importance	5	5	2	4	4	5	2	4	5	5	5	5	4	4	5	4	5	4	4	5	2	5	4	5	4	5	5	5	5	2	5	5	4	5	5	5	5	4	4	4	4	5	5	4	5	5	2
		Public/Internally	Yes	No	No	Yes	Yes	No	No	No	No	No	No	No	No	No	No	No	Yes	No	Yes	No	No	No	No	No	No	No	No	No	No	No	No	Yes	No	Yes	Yes	No	No	Yes	No	No	No	No	No	Yes	No	No	No
		Established?	Yes	Partially	No	No	Yes	Yes	Partially	No	Yes	Yes	Partially	Yes	Partially	Partially	Partially	Partially	No	Partially	Partially	Yes	No	Yes	Yes	Partially	Partially	Yes	No	Yes	Yes	Yes	Partially	Partially	No	Yes	No	Yes	Yes	No	Partially	No	Yes	Partially	Partially	Partially	No	No	Partially
12	I commit to publicly document the responsibilities of each lab role and the training provided.	Importance	5	5	2	2	5	4	4	5	5	3	2	3	5	4	5	4	5	5	3	5	4	5	5	5	2	5	4	5	4	3	5	5	5	5	5	5	5	5	3	4	5	4	5	4	1	5	4
		Public/Internally	Yes	Yes	No	Yes	Yes	No	Yes	No	No	No	No	Yes	No	Yes	No	No	Yes	Yes	Yes	No	Yes	Yes	No	No	No	Yes	Yes	No	No	No	No	Yes	No	No	Yes	No	No	Yes	No	Yes	No	No	No	Yes	No	No	No
		Established?	Yes	Partially	No	No	Partially	Yes	Partially	No	Yes	Partially	No	No	Yes	No	Partially	Partially	No	Partially	No	Partially	No	Yes	No	No	Partially	Partially	No	Partially	Partially	No	No	No	No	Yes	No	No	Yes	No	No	No	Yes	Don't know	Partially	Yes	No	No	No
13	I commit to document the onboarding procedure for new lab members.	Importance	5	5	2	4	5	5	5	4	5	2	5	4	4	5	5	5	5	5	5	5	1	5	4	5	4	5	5	5	5	5	5	5	4	5	4	4	5	5	5	4	5	4	5	4	5	5	3
		Established?	Yes	Partially	No	Partially	Partially	Yes	No	Yes	Partially	Partially	Yes	Partially	No	Partially	Partially	Yes	Partially	Partially	Yes	Yes	No	Yes	Partially	Partially	Partially	No	No	Partially	Yes	Yes	No	No	No	Partially	No	No	No	Yes	No	Partially	Yes	Partially	Yes	Partially	Yes	No	Partially
14	I commit to document how equal access to lab resources across lab members is maintained.	Importance	5	4	3	5	5	5	3	3	4	2	3	3	5	4	5	5	5	5	3	5	2	5	3	5	4	3	3	5	4	4	5	5	4	5	3	4	5	5	5	3	3	4	3	3	3	5	3
		Established?	Yes	Yes	Partially	No	Partially	Yes	Partially	No	Don't know	Partially	No	No	Yes	No	Partially	Partially	Partially	Yes	No	Yes	No	Partially	No	Partially	No	No	No	Partially	Yes	No	Partially	Don't know	No	Yes	No	No	Partially	No	No	Partially	No	No	No	No	Partially	No	No
15	I commit to establish annual lab-wide feedback sessions.	Importance	5	5	2	5	4	5	2	4	5	3	5	4	4	4	5	4	5	4	4	3	1	5	5	4	4	4	3	3	4	2	4	5	5	5	5	5	5	4	5	4	2	5	4	5	5	5	4
		Established?	Yes	Partially	No	Partially	Yes	Partially	Partially	No	No	Partially	Yes	Yes	Yes	No	Partially	No	No	No	Yes	No	No	No	No	Partially	Partially	No	No	No	No	No	No	No	No	Yes	No	Yes	Yes	No	Partially	No	No	No	No	Yes	No	No	Partially
16	I commit to establish annual bilateral feedback and appraisal sessions for each lab member.	Importance	5	5	1	5	4	5	1	4	3	3	5	4	4	5	5	5	5	5	4	5	1	5	5	4	4	3	5	2	5	3	5	3	5	5	5	5	5	5	5	3	5	5	5	4	5	5	4
		Established?	Yes	No	No	Yes	Partially	No	No	Partially	Don't know	No	Yes	Yes	Yes	Yes	No	Yes	No	No	Yes	Yes	No	Yes	Yes	Yes	Yes	No	Yes	No	Yes	Partially	No	No	No	Yes	No	Yes	Yes	Yes	Partially	Yes	Yes	Yes	Yes	Yes	Partially	No	Partially
17	I commit to establish annual lab-wide meetings to normalise failures.	Importance	5	5	1	5	5	5	2	5	3	3	1	3	4	5	5	5	5	4	2	1	1	5	3	4	4	4	4	3	4	3	3	5	3	5	1	5	5	5	5	4	3	5	3	1	4	4	3
		Established?	Yes	No	No	No	Yes	No	No	No	No	No	No	No	Yes	No	No	Yes	No	No	No	Partially	No	Yes	No	No	No	No	No	No	Partially	No	No	No	No	Yes	No	No	Yes	No	Partially	No	No	Partially	No	Yes	No	No	No
18	I commit to establish a mechanism to record key outcomes from each 1-on-1 meeting.	Importance	5	5	1	5	5	5	3	4	5	3	3	5	5	4	5	4	5	4	4	3	1	5	4	3	4	2	5	3	5	4	5	5	4	5	5	5	5	4	5	5	4	4	5	5	5	5	5
		Established?	Yes	Partially	No	Partially	Yes	Yes	No	Partially	No	Partially	No	Yes	Yes	No	No	No	Partially	Yes	Partially	Partially	No	Yes	Yes	No	Partially	No	Partially	Partially	Yes	Partially	Partially	No	No	Yes	No	No	Yes	No	Partially	No	No	No	Don't know	No	Yes	No	Partially
19	I commit to establish a “PhD Steering Committee” to annually monitor progress and mediate feedback.	Importance	5	5	2	3	5	4	3	5	5	4	5	5	5	5	5	5	5	5	3	5	3	5	4	4	4	1	2	2	5	5	5	3	5	5	5	5	5	3	5	5	5	4	4	5	5	5	5
		Established?	Yes	Yes	No	No	Partially	Yes	Partially	Partially	Yes	Yes	Yes	Yes	Yes	Yes	Partially	Yes	Partially	Yes	Yes	Yes	Don't know	Yes	No	Partially	No	No	Partially	Partially	Yes	Yes	No	Yes	Yes	Yes	Yes	Don't know	Yes	No	Yes	Don't know	Yes	Don't know	Don't know	Yes	Yes	Partially	Partially
20	I commit to publicly document which contributions constitute authorship on a scientific paper.	Importance	5	5	2	2	3	5	4	5	4	5	3	3	5	4	5	4	5	5	5	3	3	5	5	4	4	5	5	5	4	5	4	5	5	5	5	5	5	5	4	4	4	5	3	4	3	5	4
		Established?	Yes	Yes	No	No	Partially	Yes	Partially	No	Don't know	No	No	No	Yes	No	Partially	No	Partially	Partially	No	Partially	No	No	No	No	No	No	No	Partially	Partially	Partially	No	Partially	No	Yes	No	No	Yes	No	Partially	Don't know	Yes	No	Don't know	No	No	No	No
21	I commit to publicly document my ambitions for the duration and publication outputs for each lab role.	Importance	5	5	1	5	4	4	4	4	4	3	3	4	5	5	5	3	5	5	3	1	3	5	4	5	3	3	3	2	4	3	5	5	5	5	3	5	5	2	2	1	3	4	4	1	5	5	4
		Public/Internally	Yes	Yes	No	Yes	Yes	No	Yes	No	No	No	No	No	No	Yes	No	No	Yes	No	No	No	No	Yes	No	No	No	Yes	Yes	No	No	No	Yes	Yes	No	No	Yes	No	No	No	No	No	No	No	No	No	No	No	No
		Established?	Yes	Yes	No	Partially	Partially	Partially	Partially	No	Don't know	Partially	No	No	Yes	No	Partially	No	Partially	Partially	No	No	Don't know	Yes	No	No	Partially	No	No	No	Partially	No	No	No	Partially	Partially	No	No	Yes	No	No	No	Partially	No	Don't know	No	Partially	No	Partially
22	I commit to publicly document expectations and funding for conference/summer school attendance.	Importance	5	4	2	4	3	3	3	3	4	3	5	3	5	3	5	4	5	4	3	3	1	5	4	3	4	3	5	4	4	3	4	5	4	5	5	5	5	3	4	2	4	4	4	4	4	5	3
		Public/Internally	Yes	No	No	No	No	No	Yes	No	No	No	No	No	Yes	No	No	No	Yes	No	No	No	No	Yes	No	No	No	No	No	Yes	No	No	Yes	Yes	No	No	Yes	No	Yes	Yes	No	No	No	No	Yes	Yes	No	Yes	No
		Established?	Yes	Partially	No	Partially	Partially	No	Yes	No	Yes	Partially	No	No	Yes	No	Partially	Partially	Partially	Partially	No	Partially	No	Partially	No	Partially	Partially	No	No	No	Partially	No	No	No	Partially	Yes	No	Partially	Yes	No	Partially	Don't know	Partially	Partially	No	No	Partially	No	No
23	I commit to publicly document guidelines for completing previous work after joining the lab.	Importance	5	5	2	4	4	5	4	4	4	2	4	3	4	3	5	4	5	5	3	3	1	5	4	4	3	2	5	5	4	2	3	5	3	5	5	2	5	4	4	3	5	4	3	5	4	5	3
		Public/Internally	Yes	Yes	No	No	Yes	Yes	Yes	No	No	No	No	No	No	Yes	No	No	Yes	No	Yes	No	No	Yes	No	No	No	No	No	No	No	No	No	Yes	No	Yes	No	No	Yes	Yes	Yes	No	No	No	No	No	No	No	No
		Established?	Yes	Partially	No	No	No	Partially	Partially	No	No	Partially	No	No	Yes	No	No	No	Partially	Partially	No	Partially	No	Don't know	No	No	No	No	No	No	Partially	No	No	No	Don't know	Yes	No	No	Yes	Partially	No	Don't know	No	No	Don't know	No	No	No	No
24	I commit to publicly document the process for funding Postdocs.	Importance	5	5	3	4	4	5	2	4	5	4	5	3	5	4	5	5	5	4	4	1	1	5	4	5	4	5	5	4	4	5	5	5	5	5	5	5	5	4	2	5	3	4	5	5	5	5	3
		Public/Internally	Yes	Yes	Yes	Yes	No	Yes	No	No	No	No	Yes	No	Yes	Yes	No	No	Yes	No	No	No	No	Yes	No	No	No	Yes	Yes	Yes	No	Yes	No	No	Yes	Yes	Yes	No	Yes	Yes	No	No	No	No	Yes	Yes	No	Yes	No
		Established?	Yes	Partially	No	No	Partially	Yes	No	No	No	Yes	No	No	Don't know	No	Partially	Yes	No	Yes	No	No	No	Don't know	No	Partially	No	No	No	No	Partially	Yes	No	Don't know	Partially	Yes	No	No	Partially	Yes	Don't know	No	No	No	Don't know	Don't know	Yes	No	Don't know
25	I commit to publicly document the visa-support available to overseas applicants.	Importance	5	5	3	5	5	4	2	5	4	2	5	4	3	5	5	4	3	4	4	3	1	4	5	5	4	5	5	5	4	5	5	5	5	5	5	5	5	4	4	5	4	3	5	4	3	5	1
		Established?	Yes	No	Partially	No	No	Partially	No	Partially	No	No	No	No	Yes	No	No	Yes	No	No	No	No	No	Don't know	No	Partially	Partially	Yes	Yes	No	No	Yes	No	No	Partially	Partially	No	No	Yes	Yes	No	Don't know	Partially	No	Don't know	Yes	No	No	Partially
26	I commit to document the procedure for requesting reference letters.	Importance	5	4	2	3	3	5	2	3	5	2	3	3	5	4	5	4	5	3	2	4	1	3	4	3	4	2	5	5	5	5	5	5	4	5	5	3	5	3	5	5	5	4	3	2	5	5	1
		Established?	Yes	Partially	No	No	No	Yes	No	No	Don't know	No	No	No	Yes	No	Yes	Yes	Partially	Yes	No	Partially	No	Don't know	No	No	No	No	Partially	No	Yes	Yes	No	No	No	Yes	No	No	Yes	Partially	Partially	No	No	No	Don't know	No	Yes	No	No
27	I commit to document the procedure for leaving the lab, including an exit interview.	Importance	5	5	2	5	4	4	3	3	5	2	5	4	3	5	5	4	4	5	3	5	2	5	4	4	4	4	5	5	4	3	4	5	4	4	5	5	5	5	5	4	5	4	3	3	5	5	4
		Established?	Yes	No	No	No	Partially	No	Partially	No	Don't know	No	No	No	Don't know	No	Partially	Yes	Don't know	No	No	Yes	No	Don't know	No	No	No	No	Partially	No	Partially	No	No	No	No	No	No	No	No	No	No	Partially	No	No	No	Partially	No	No	No
28	I commit to establish annual lab-wide meetings to review training and outcomes for “core skills”.	Importance	5	4	2	4	4	4	2	3	3	2	3	3	3	4	5	4	5	4	2	4	1	3	5	3	3	4	5	4	4	2	4	5	4	5	5	3	5	4	4	5	4	3	4	2	3	5	4
		Established?	Yes	No	No	No	Partially	No	No	No	No	No	No	No	Don't know	Partially	No	No	No	Partially	No	Partially	No	Partially	No	No	No	No	No	No	Partially	No	No	Don't know	No	Partially	No	No	Partially	No	No	No	No	No	Partially	No	No	No	No
29	I commit to establish a mechanism for sharing lab management updates.	Importance	5	5	3	3	5	5	3	3	3	3	5	2	5	3	5	4	5	5	3	5	1	5	4	4	4	3	5	3	5	5	5	5	4	5	5	5	5	4	3	4	4	4	5	2	4	5	3
		Established?	Yes	No	No	No	Yes	Partially	Partially	No	Partially	Partially	No	No	Yes	No	Yes	Partially	No	No	No	Yes	No	Partially	No	Yes	Partially	No	Partially	Partially	Yes	Yes	No	No	Partially	Yes	No	Partially	Yes	Partially	No	Partially	No	No	Don't know	No	Partially	No	Don't know
30	I commit to establish an objective and equitable interview process.	Importance	5	5	3	5	5	5	3	5	5	2	5	4	5	5	5	5	4	4	3	4	1	5	3	3	4	3	3	5	5	4	5	5	5	5	5	4	5	5	4	5	5	5	4	4	5	5	5
		Established?	Yes	Partially	Partially	No	Yes	Yes	Partially	Yes	Partially	No	Yes	No	Yes	Partially	Partially	Yes	Don't know	No	No	Yes	No	Yes	Partially	No	Yes	No	Partially	Yes	Partially	Partially	No	No	Partially	Yes	No	No	Yes	Yes	Partially	No	Yes	Yes	Yes	Yes	Yes	No	Yes
31	Final thoughts	Implement							Yes	Yes	Yes	Maybe	Maybe	Yes	Maybe	Yes	Yes	Maybe	Yes	Yes	Yes	Maybe	Maybe	Yes	Yes	Yes	Maybe	Yes	Yes	Yes	Yes	Maybe	Yes	Yes	Yes	Yes	Maybe	Yes	Yes	Maybe	Yes	Maybe	Maybe	Yes	Yes	Maybe	Yes	Yes	Maybe
[truncated: 177 more columns]
